# Supplementary material for: A comprehensive analysis of the oncogenic and prognostic role of TBC1Ds in human hepatocellular carcinoma
Source: PeerJ. 2024 May 14;12:e17362. doi: 10.7717/peerj.17362 (PMC11100476; doi:10.7717/peerj.17362)
Supplement: Supplemental Information 2 [file peerj-12-17362-s002.xlsx]

## Sheet: CCK8
			OD450nm	Hep3B sgNC			Hep3B sgTBC1D8			Hep3B sgTBC1D14
			0h	0.2416	0.2166	0.2413	0.2364	0.2165	0.2236	0.2148	0.2361	0.2531
			24h	0.4123	0.4136	0.4223	0.3745	0.3946	0.3716	0.3636	0.3986	0.3842
			48h	0.7615	0.7962	0.7236	0.5536	0.5136	0.5369	0.51369	0.4963	0.5336
			72h	1.1365	1.0366	1.1864	0.7563	0.7993	0.7159	0.83546	0.73699	0.78516

## Sheet: EdU
						EdU	Hep3B sgNC			Hep3B sgTBC1D8			Hep3B sgTBC1D14
						Percentage(%)	42	39	40	15	19	17	14	20	16

## Sheet: Wound Healing
					Wound Healing	Hep3B sgNC			Hep3B sgTBC1D8			Hep3B sgTBC1D14
					Width(nm)	425	403	436	489	502	523	526	519	589
