# Supplementary material for: A comprehensive analysis of the oncogenic and prognostic role of TBC1Ds in human hepatocellular carcinoma
Source: PeerJ journal article supplement (doi:10.7717/peerj.17362), 2024-05-14
Supplement: Supportinig_Figures.pdf [file Supportinig_Figures.pdf]

## Supporting Figures:

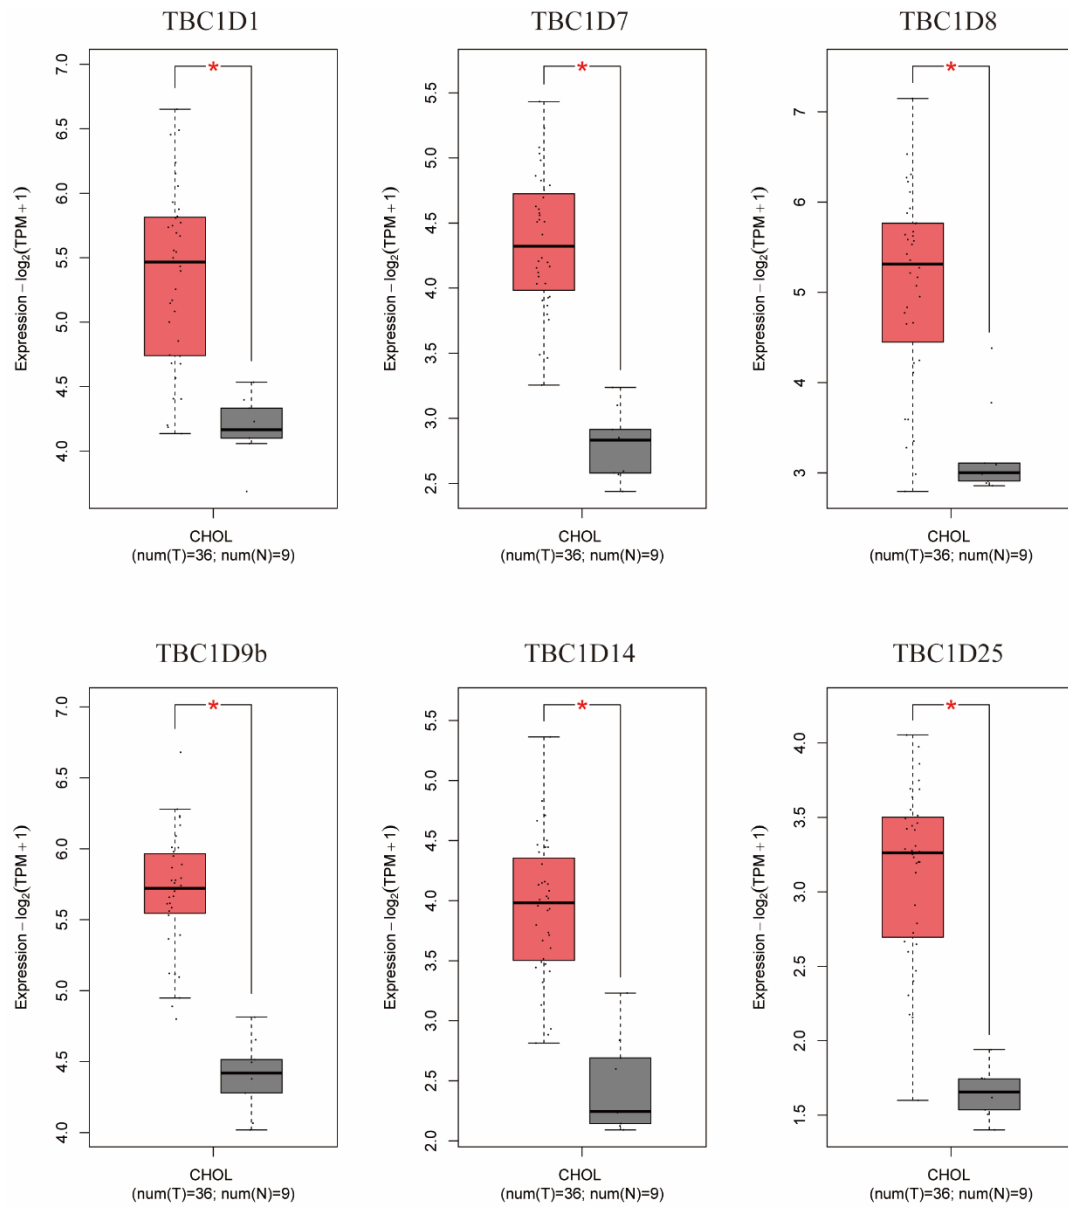

**Supporting Figure 1.** Transcript level of TBC1Ds in cholangiocarcinoma and paratumor tissues according to the t-test in GEPIA database.

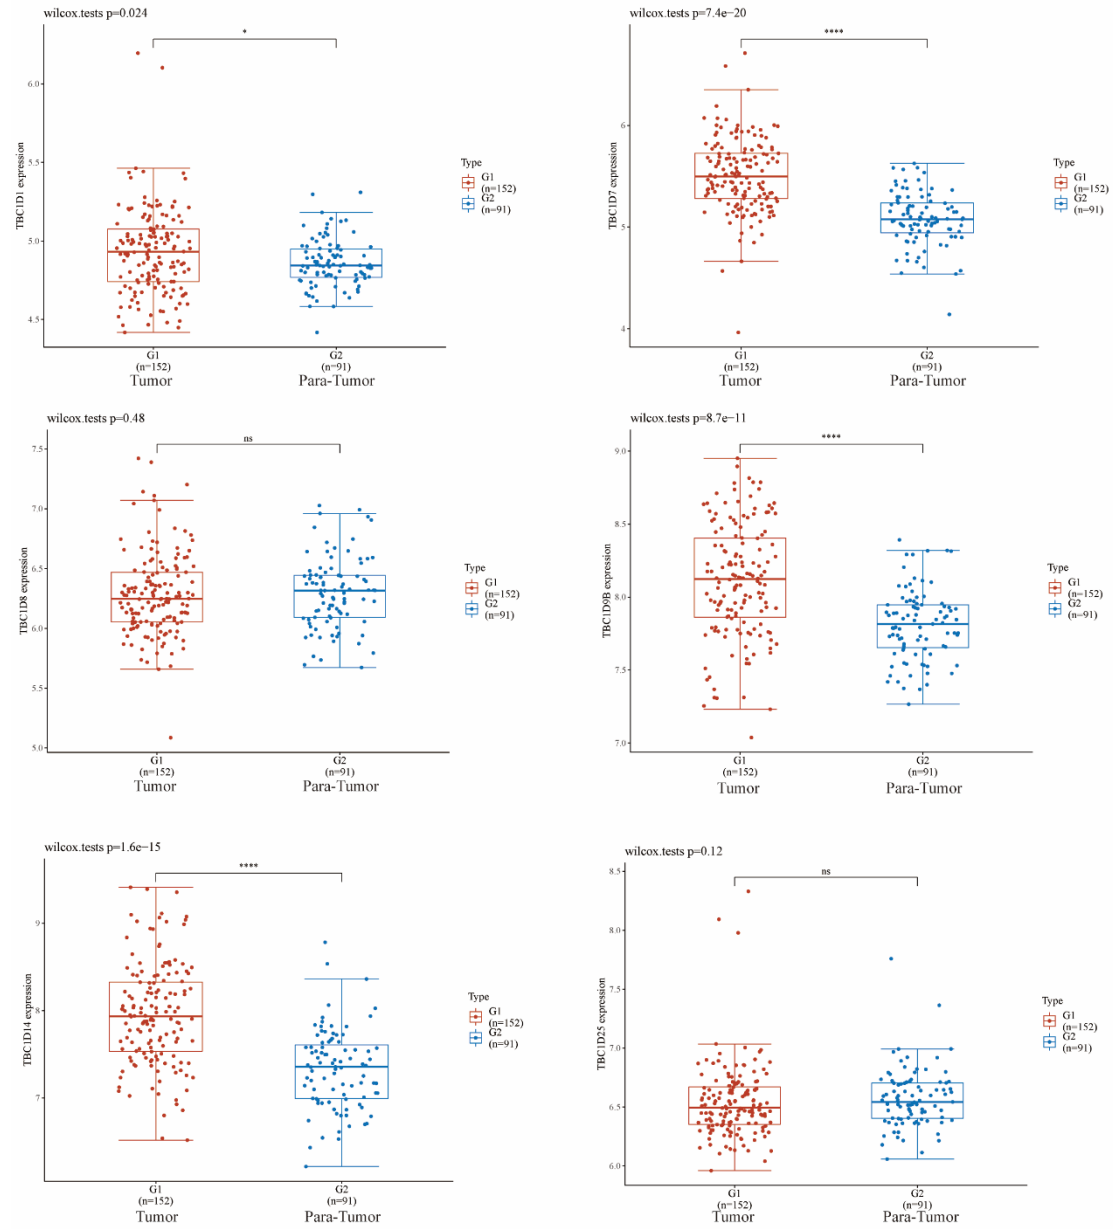

**Supporting Figure 2.** Transcript level of TBC1Ds in tumor and paratumor tissues from database of GSE102079.

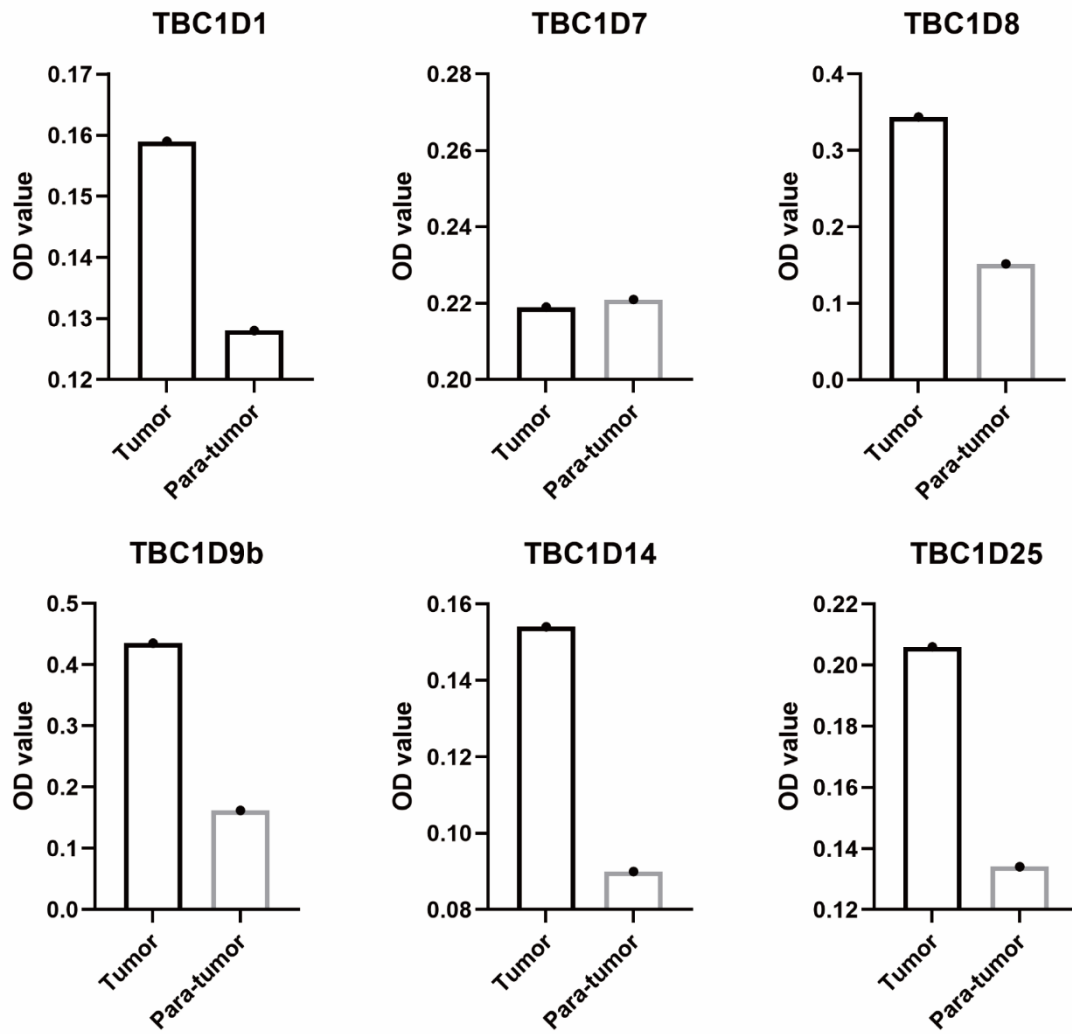

**Supporting Figure 3.** The IHC value of TBC1Ds in HCC and paratumor tissue.

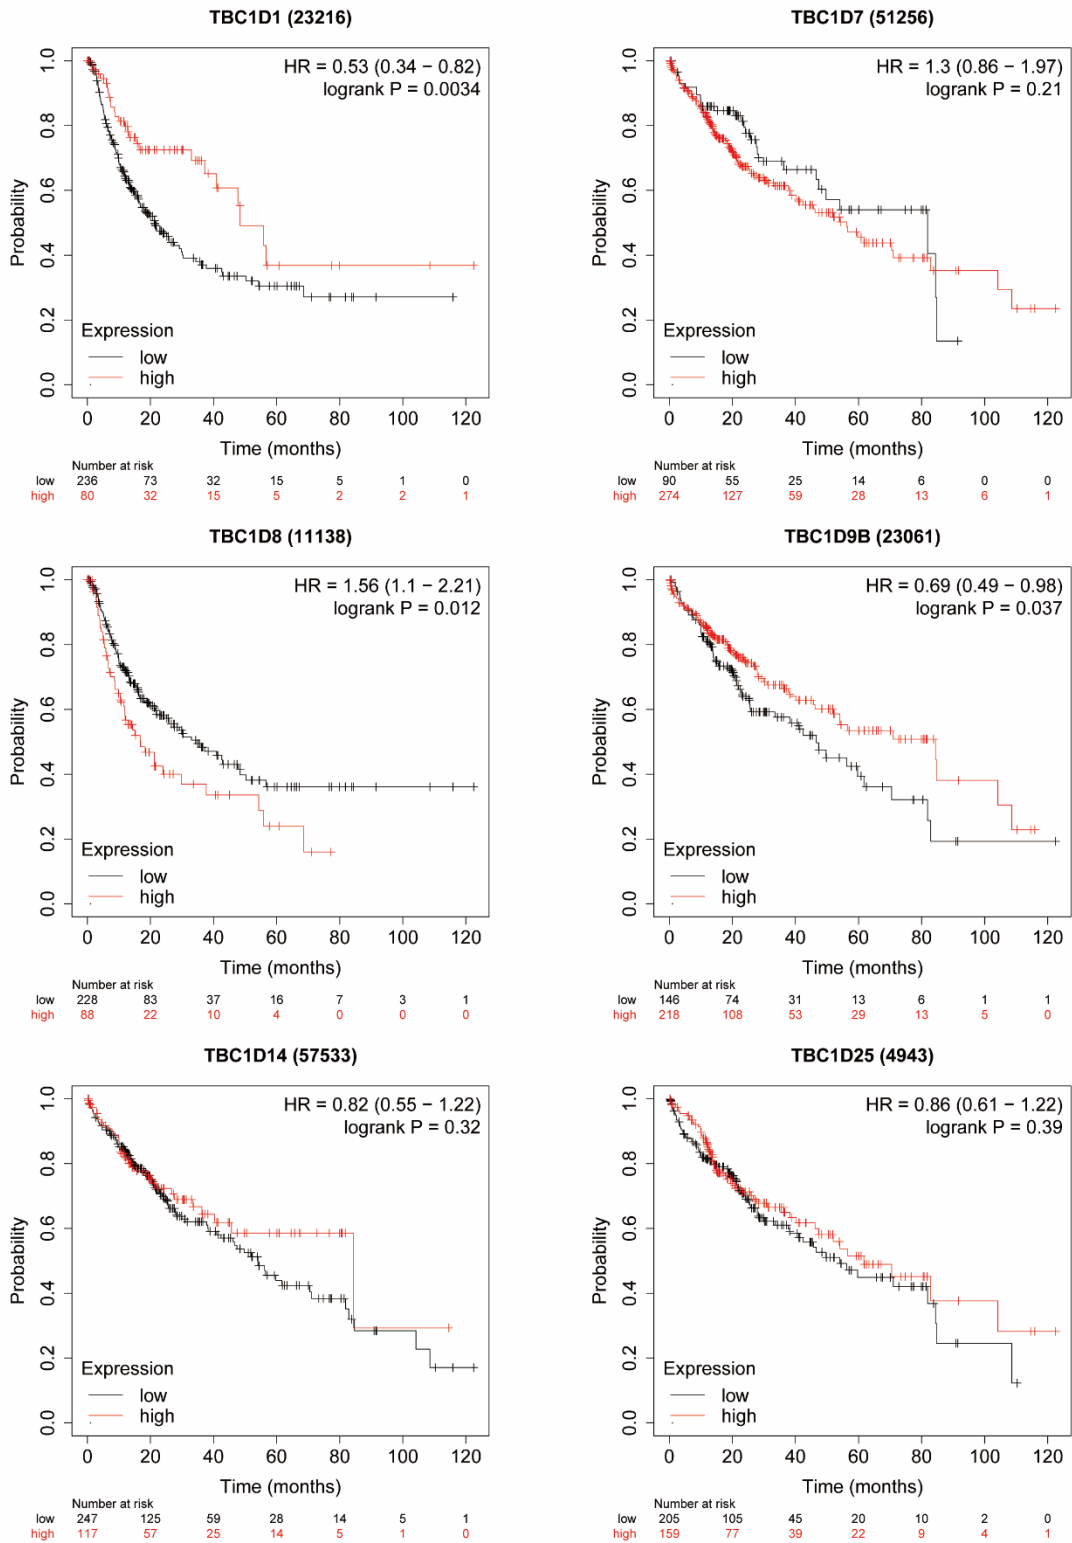

**Supporting Figure 4.** RFS analysis of the prognostic significance of TBC1Ds expressions based on the Kaplan-Meier Plotter database.

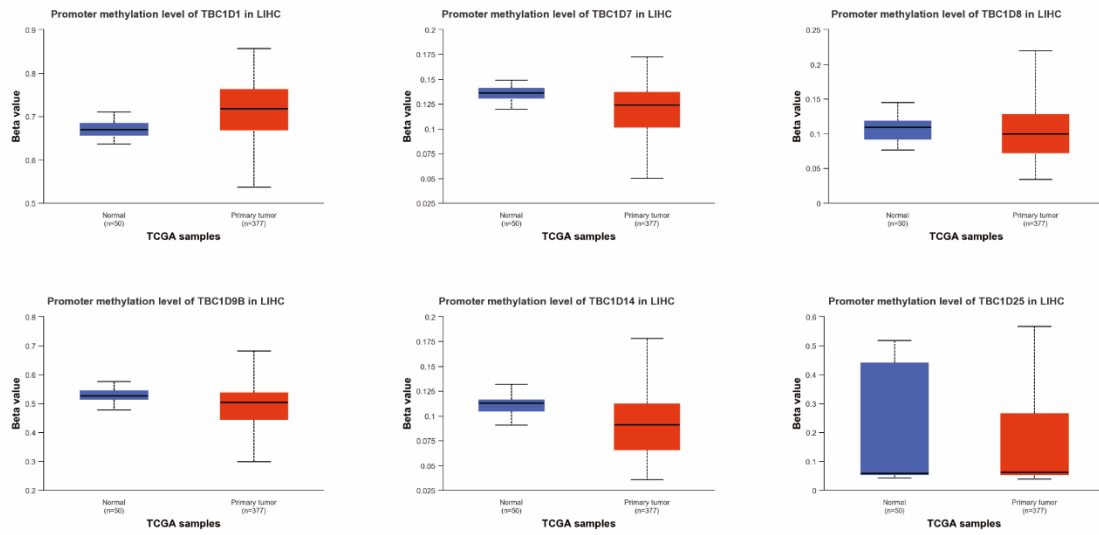

**Supporting Figure 5.** The promoter methylation levels of TBC1Ds in HCC according to UALCN database.

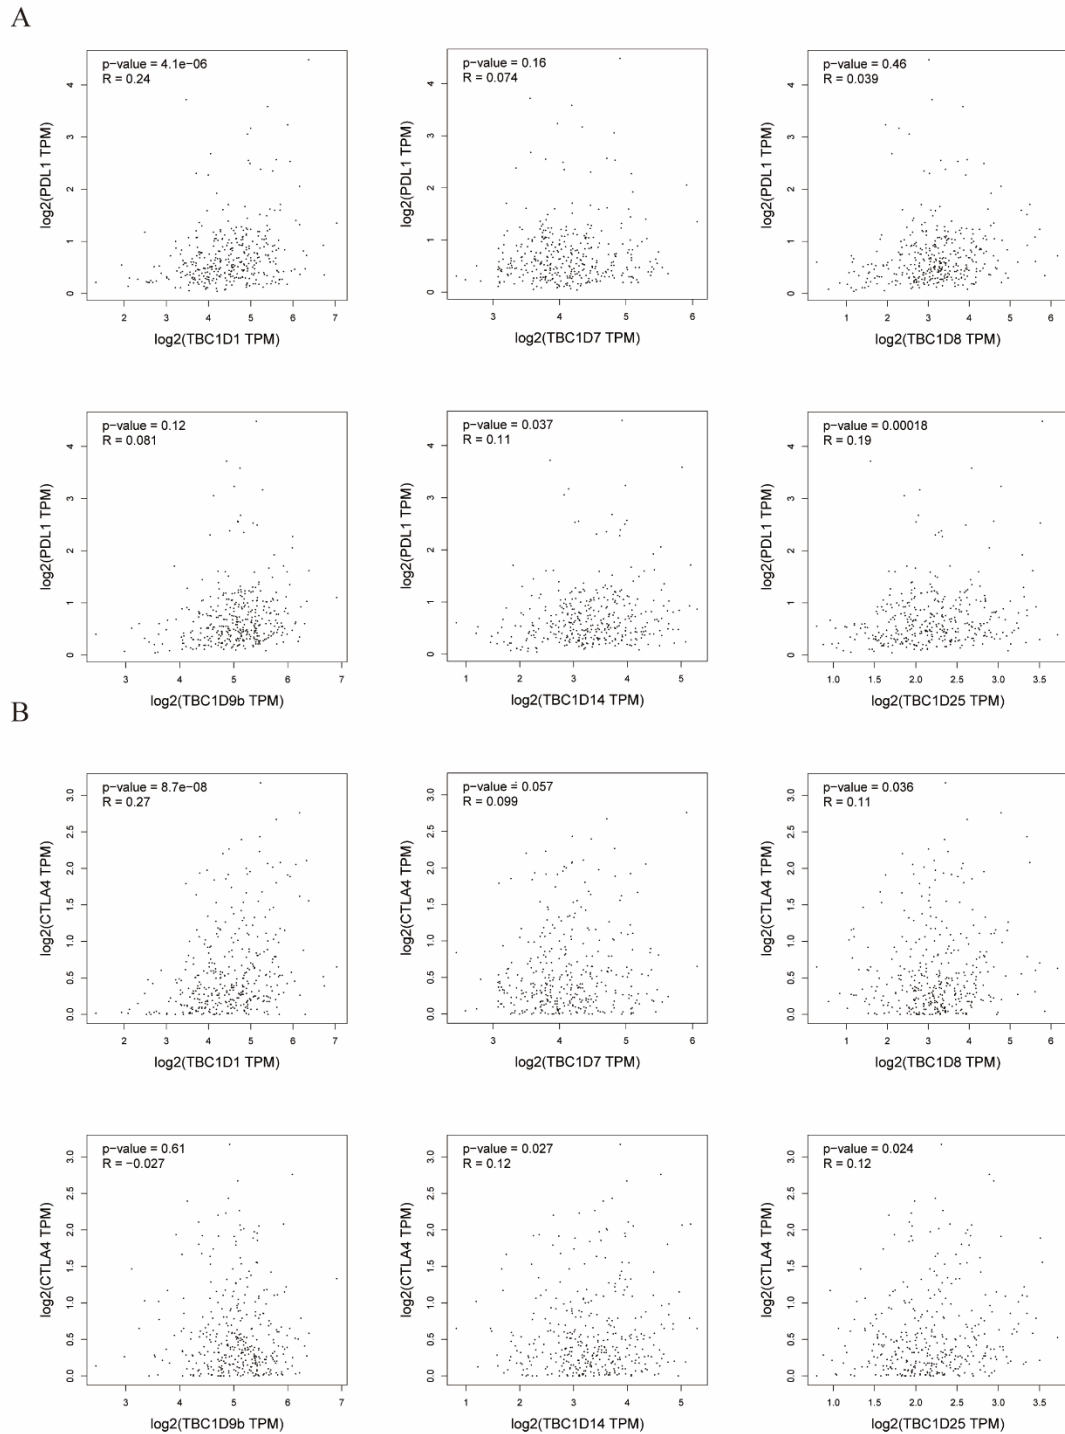

**Supporting Figure 6.** The correlation between TBC1Ds and the immune checkpoint receptors expression of PDL1 and CTLA4 in HCC.
